# Supplementary material for: Dendrobium nobile Polysaccharide Attenuates Blue Light-Induced Injury in Retinal Cells and In Vivo in Drosophila
Source: MDPI journal article supplement (doi:10.3390/antiox13050603), 2024-05-14
Supplement: s1 [file s1]

## Supplementary Figures

**Figure S1**

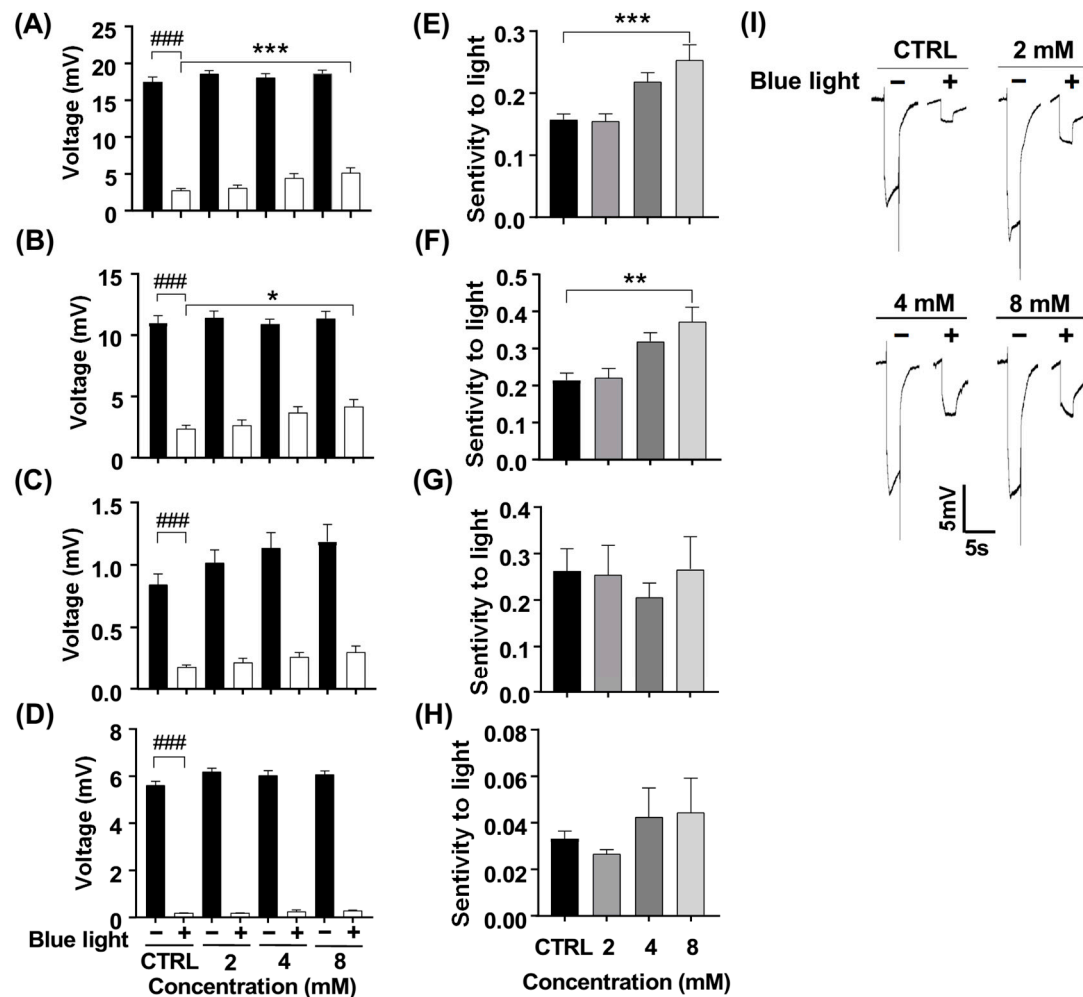

**Figure S1.** Effect of ALA on blue light-induced retinal damage in fly eyes. Male flies were pretreated with 0, 2, 4, and 8 mM ALA for 10 days. The characteristics of the ERG were recorded by the amplitudes of (A)  $\Delta V$ , (B) RPA, (C) on-transient, and (D) off-transient. The sensitivity to light of (E)  $\Delta V$ , (F) RPA, (G) on-transient, and (H) off-transient. (I) The representative ERG signals of the control and treated groups. Data are mean  $\pm$  SEM. n = 14-15. ###  $p < 0.001$  with vs. without blue light exposure. \*  $p < 0.05$ , \*\*  $p < 0.01$ , and \*\*\*  $p < 0.001$  compared to the control group.

**Figure S2**

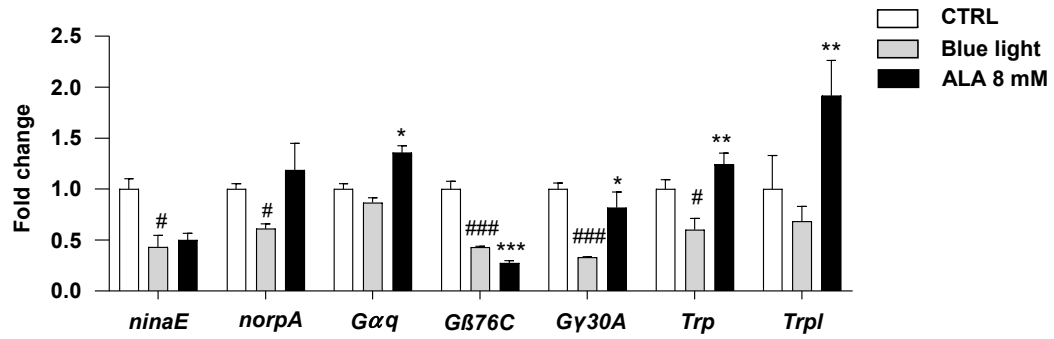

**Figure S2.** Effect of ALA pretreatment on the gene expression levels of *Drosophila* retina. ALA is a positive control. Data are mean  $\pm$  SEM from five independent experiments. #  $p < 0.05$ , ###  $p < 0.001$  compared to the control group. \*  $p < 0.05$ , \*\*  $p < 0.01$ , \*\*\*  $p < 0.001$  compared to blue light treatment only.
